# Supplementary material for: Harnessing Cyanobacteria’s Bioactive Potential: A Sustainable Strategy for Antioxidant Production
Source: MDPI journal article supplement (doi:10.3390/microorganisms12010175), 2024-01-16
Supplement: s1 [file s1]

## Supplementary information

# Harnessing Cyanobacteria's Bioactive Potential: A Sustainable Strategy for Antioxidants' Production

Teresa De Rosa <sup>1,†</sup>, Maria Ponticelli <sup>2,†</sup>, Roberta Teta <sup>1</sup>, Vittorio Carlucci <sup>2</sup>, Luigi Milella <sup>2</sup>, Germana Esposito <sup>1,\*</sup> and Valeria Costantino <sup>1,\*</sup>

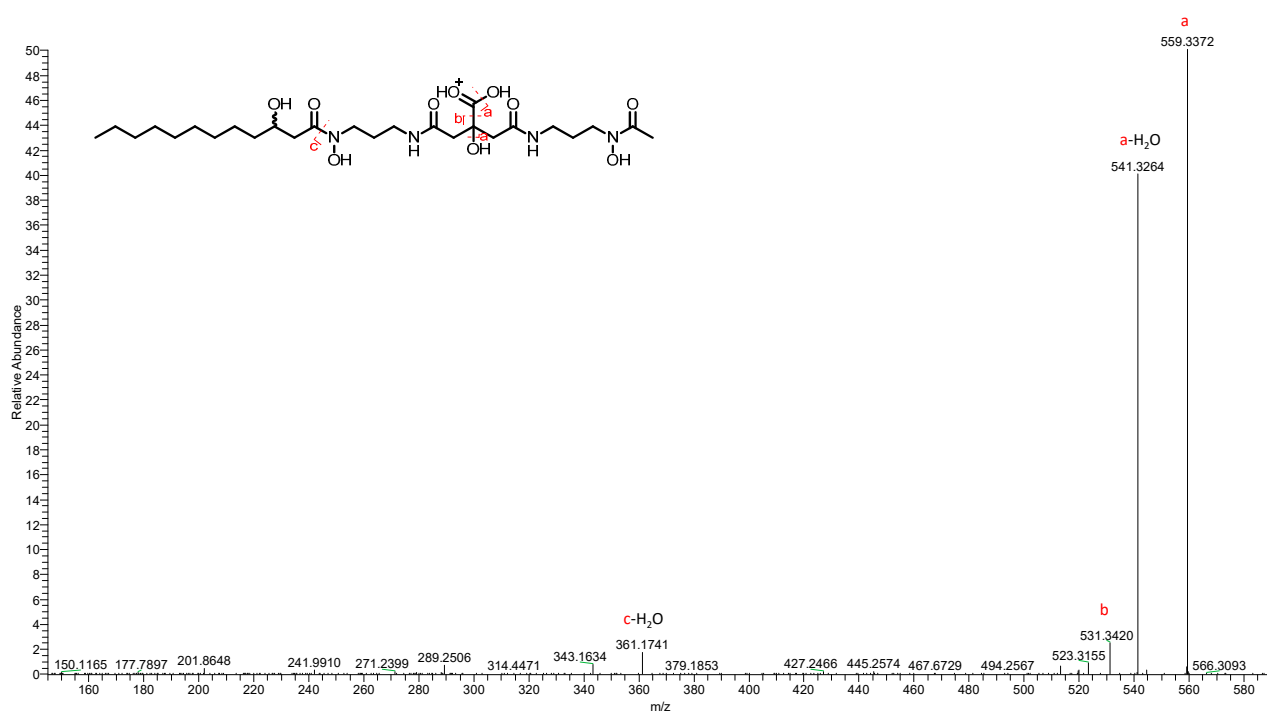

**Figure S1.** MS/MS spectrum of compound 1 m/z 577.3475 synechobactin OHC12

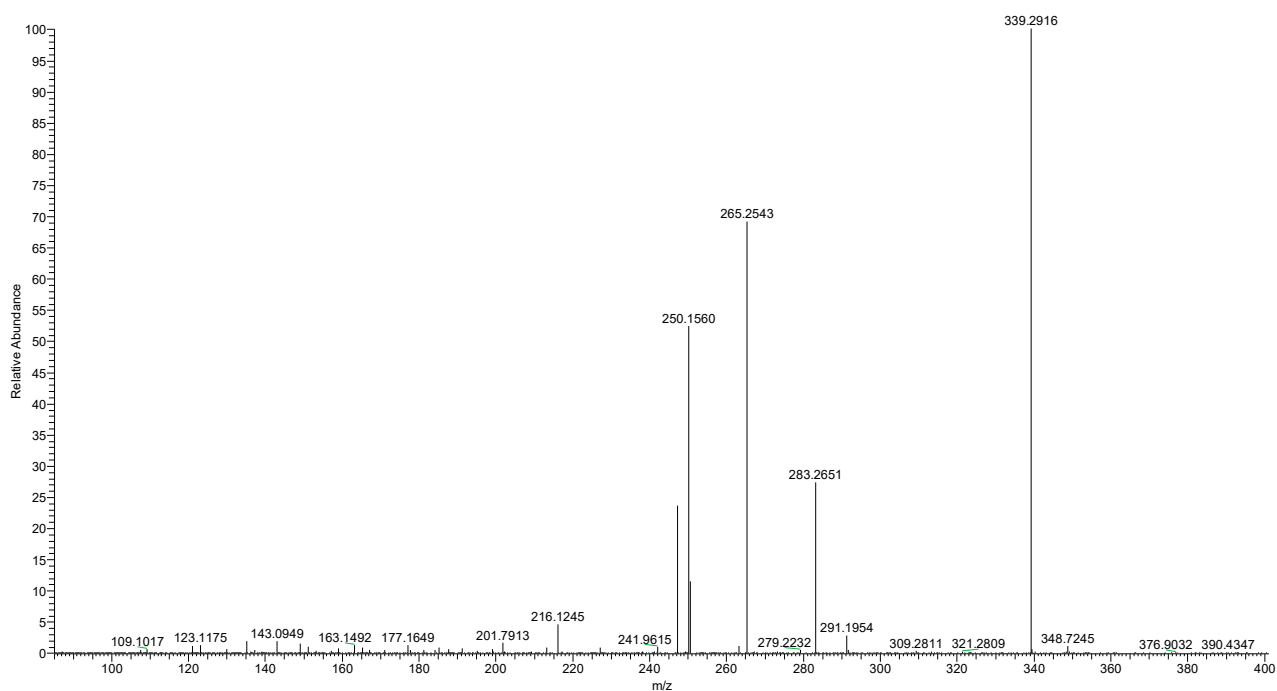

**Figure S2.** MS/MS spectrum of compound 2 m/z 357.3022 MG 18:1

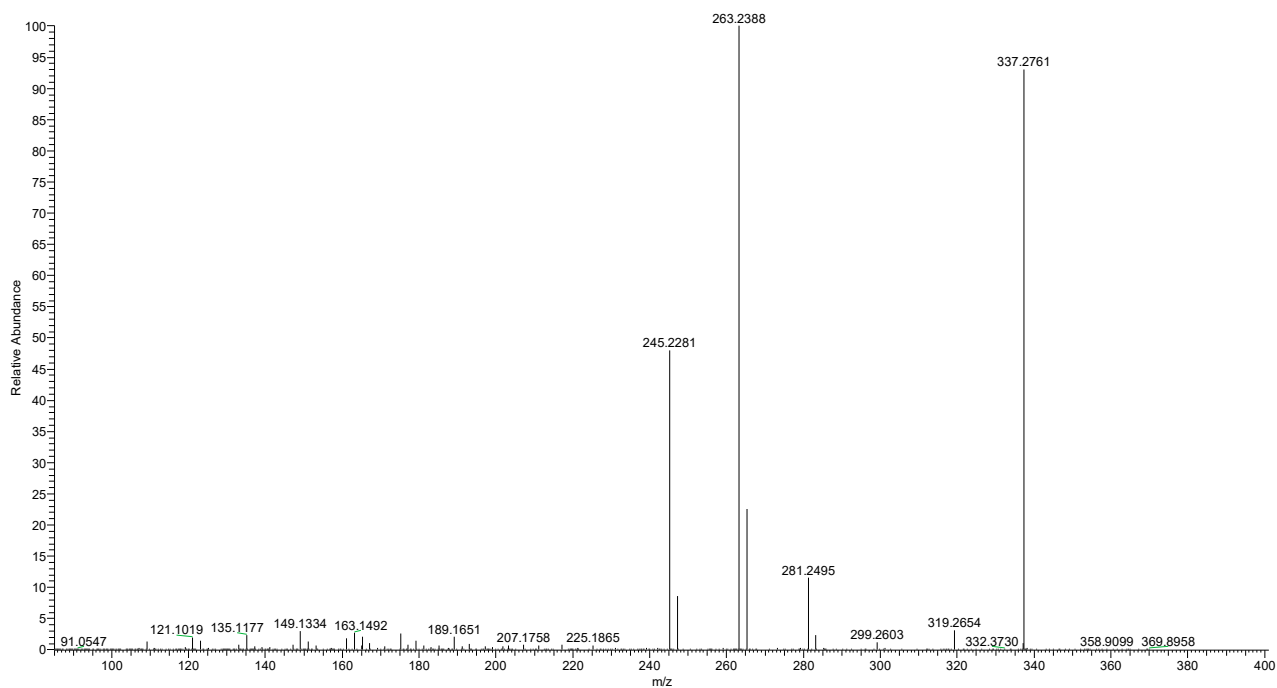

**Figure S3.** MS/MS spectrum of compound 3 m/z 355.2865 MG 18:2

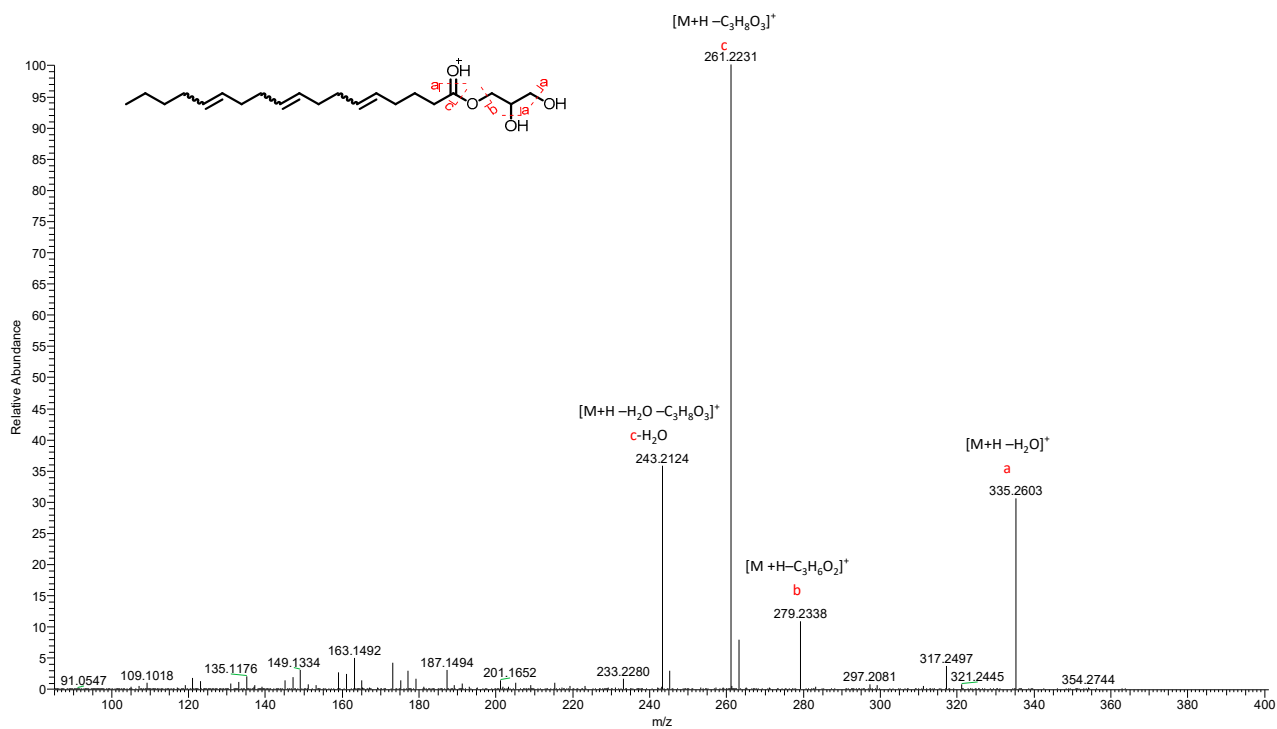

**Figure S4.** MS/MS spectrum of compound 4 m/z 353.2708 MG 18:3

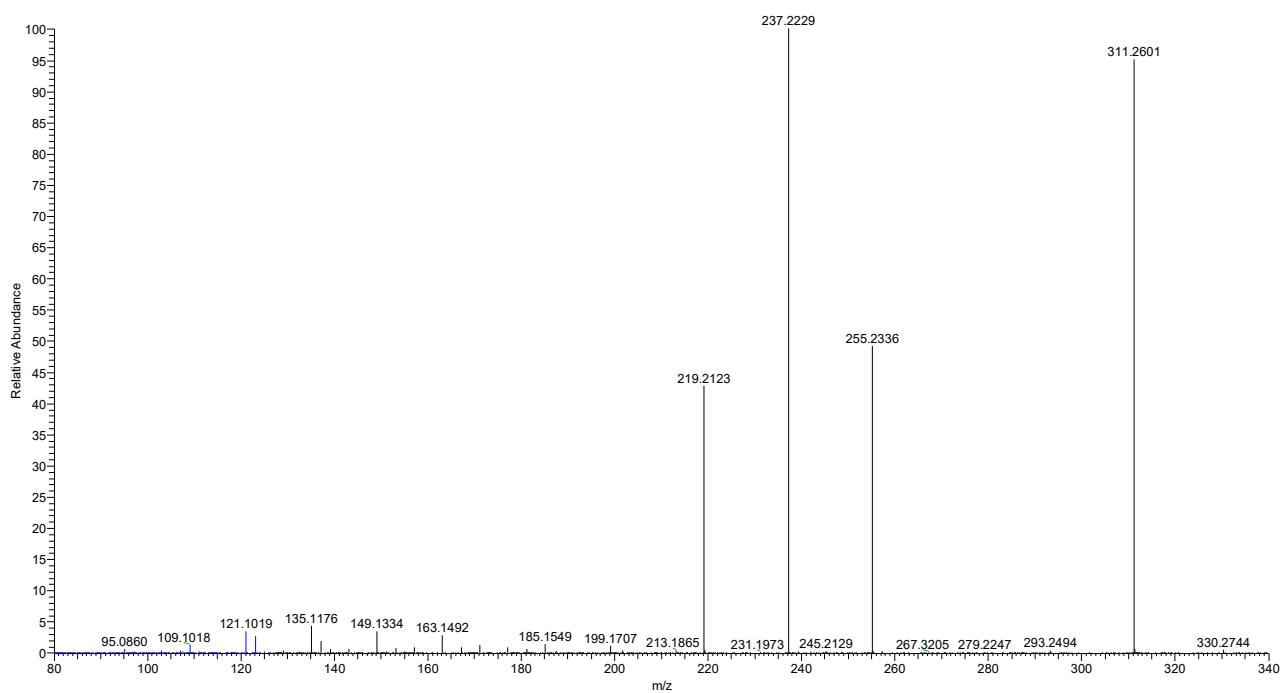

**Figure S5.** MS/MS spectrum of compound 5 m/z 329.2709 MG 16:1

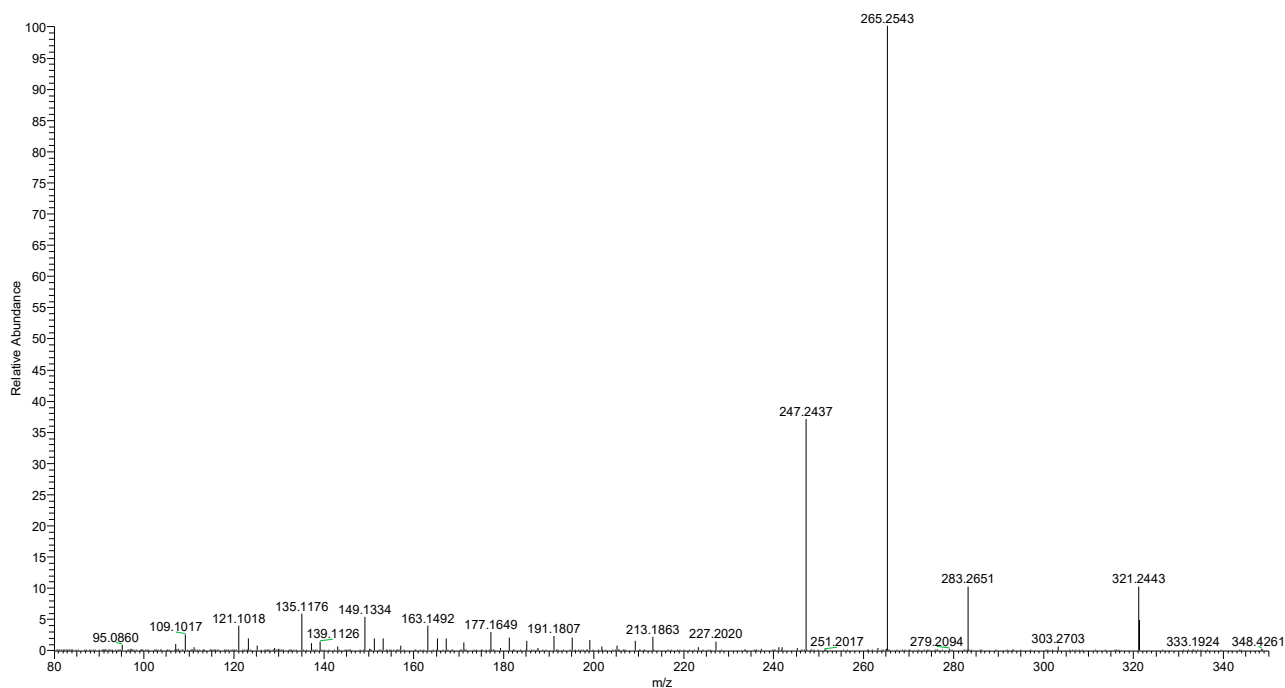

**Figure S6.** MS/MS spectrum of compound 6 m/z 339.2916 MGlycidol 18:1

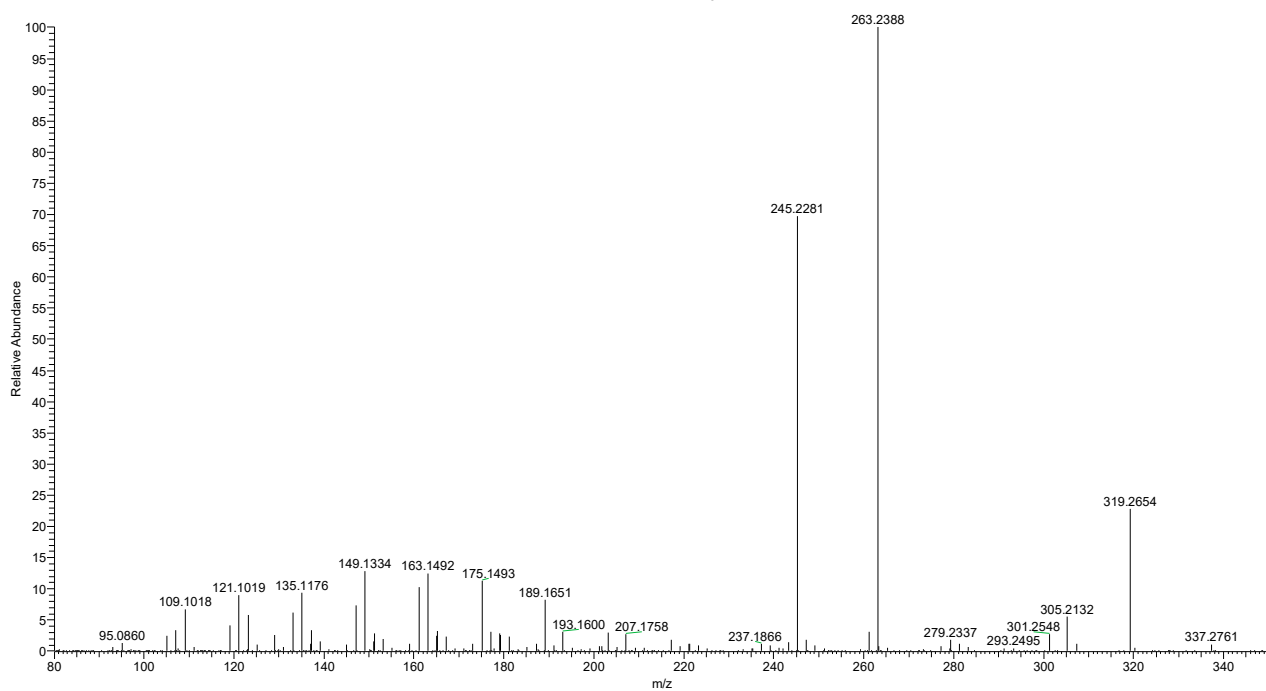

**Figure S7.** MS/MS spectrum of compound 7 m/z 337.2758 MGlycidol 18:2

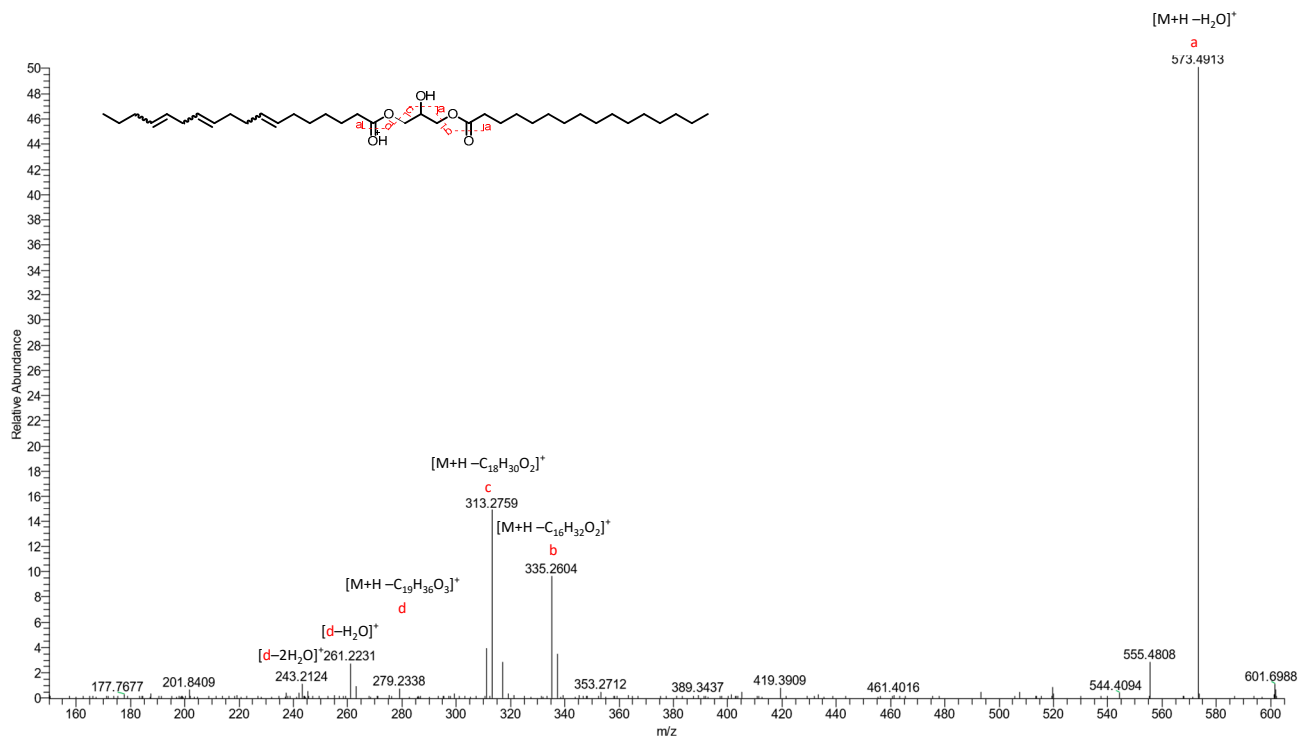

**Figure S8.** MS/MS spectrum of compound 8 m/z 591.5021 DG (18:3/16:0)

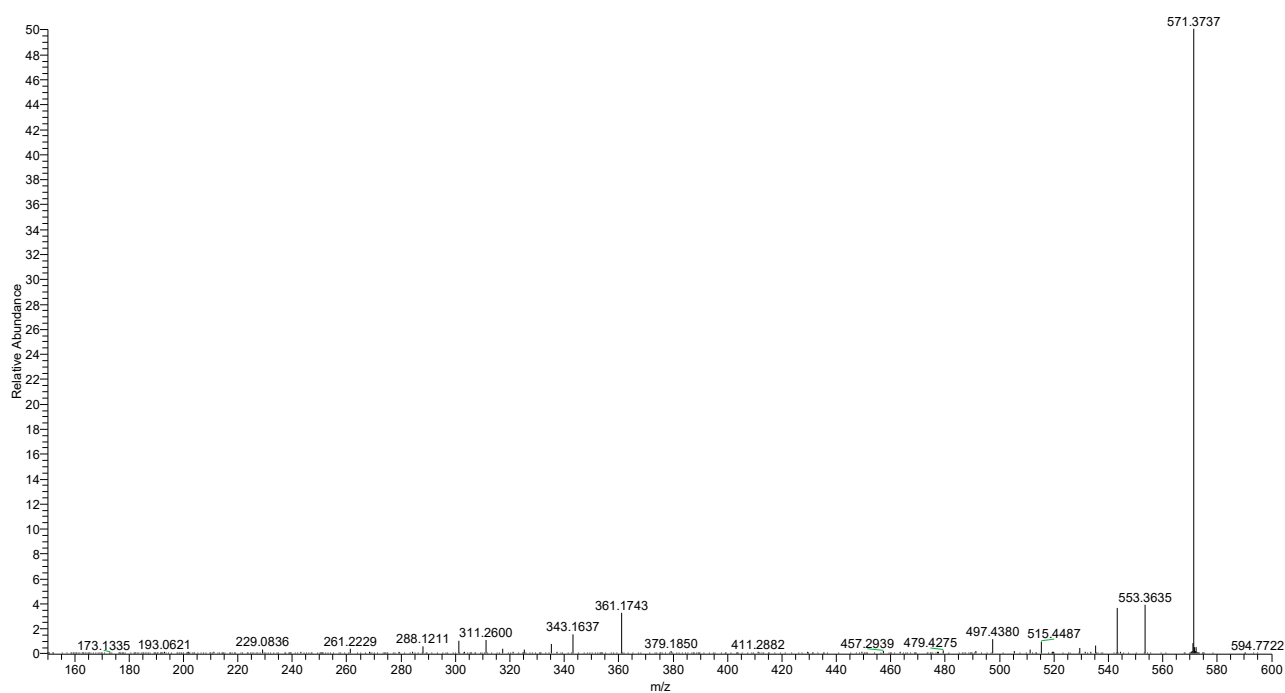

**Figure S9.** MS/MS spectrum of compound 9 m/z 589.4863 DG (18:3/16:1)

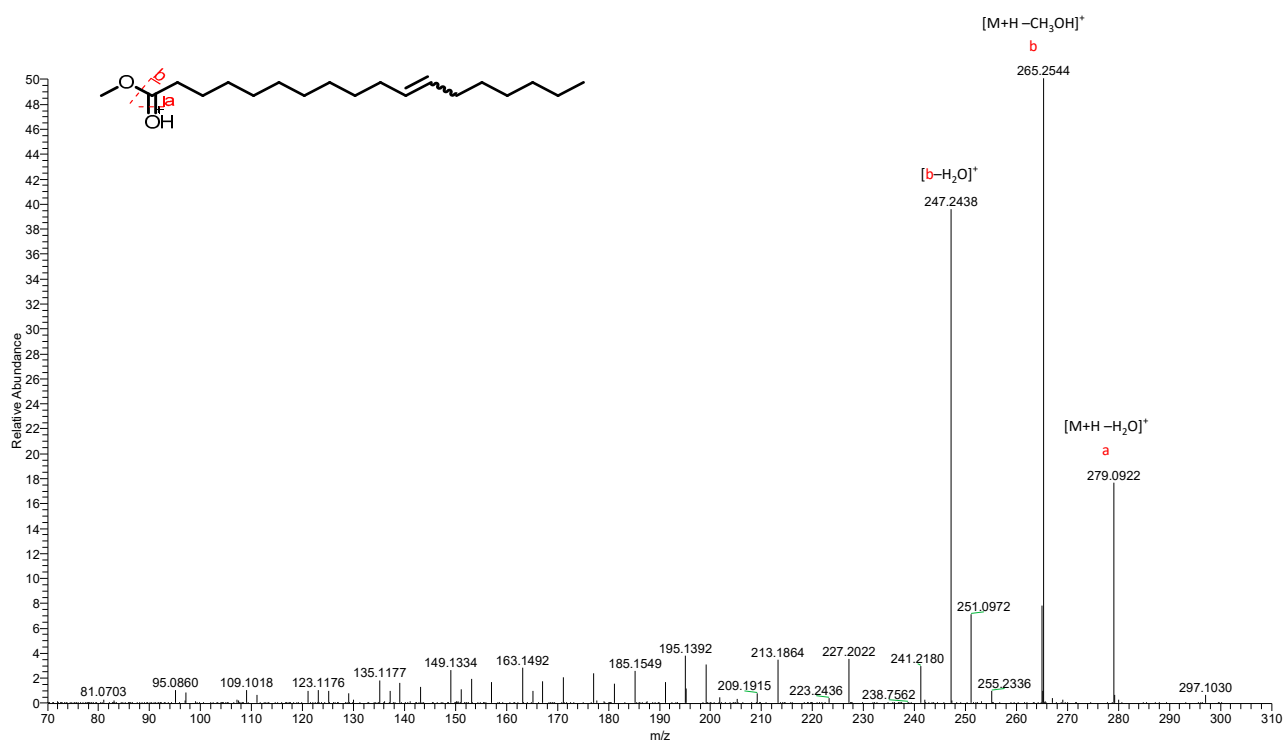

**Figure S10.** MS/MS spectrum of compound 10 m/z 297.2807 FAME 18:1

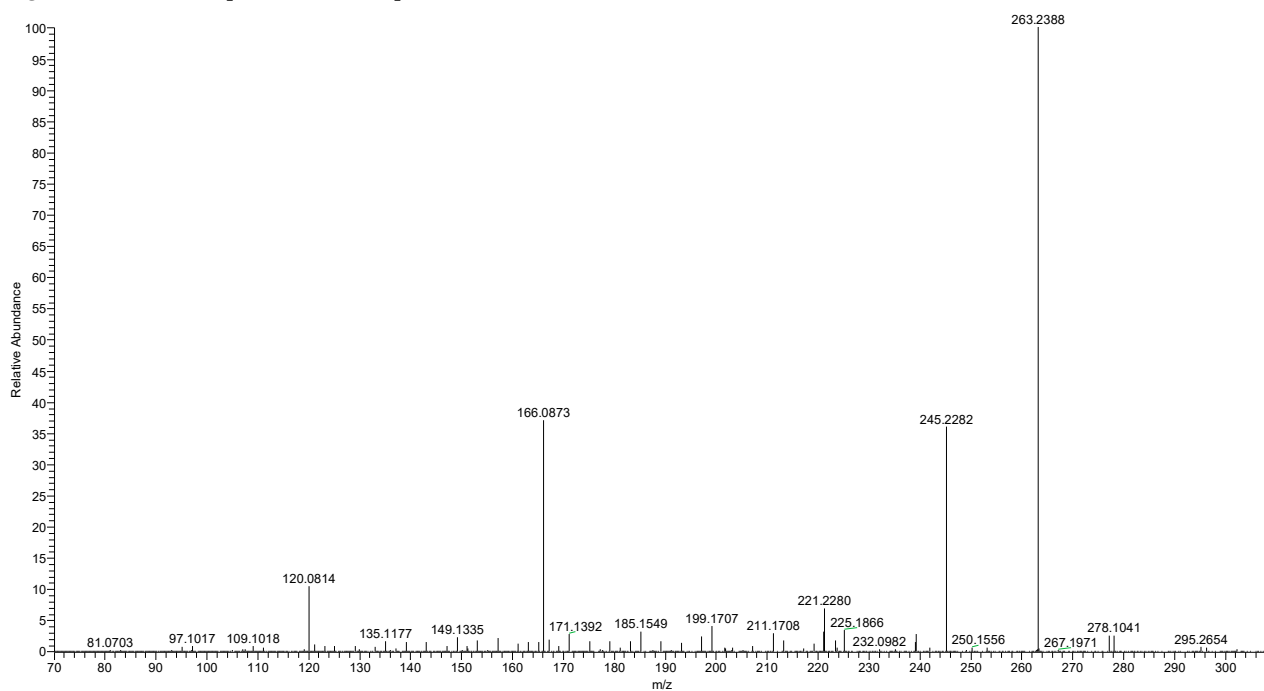

**Figure S11.** MS/MS spectrum of compound 11 m/z 295.2650 FAME 18:2

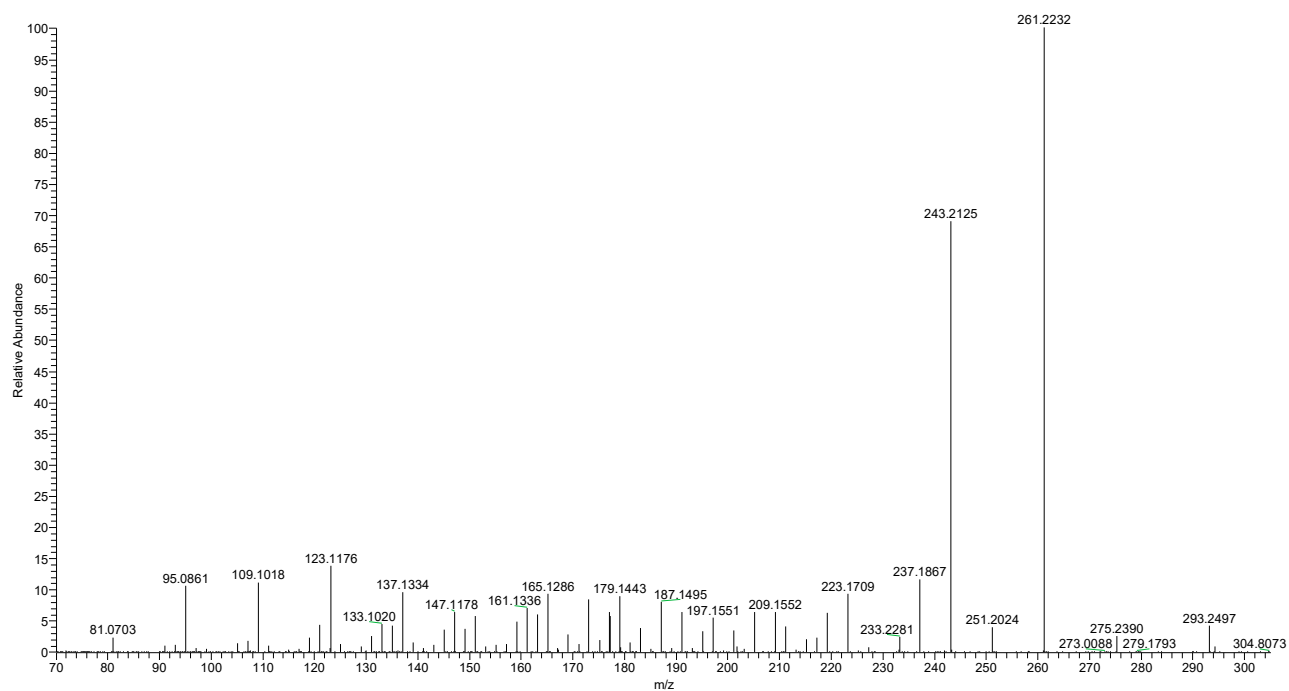

**Figure S12.** MS/MS spectrum of compound 12 m/z 293.2495 FAME 18:3

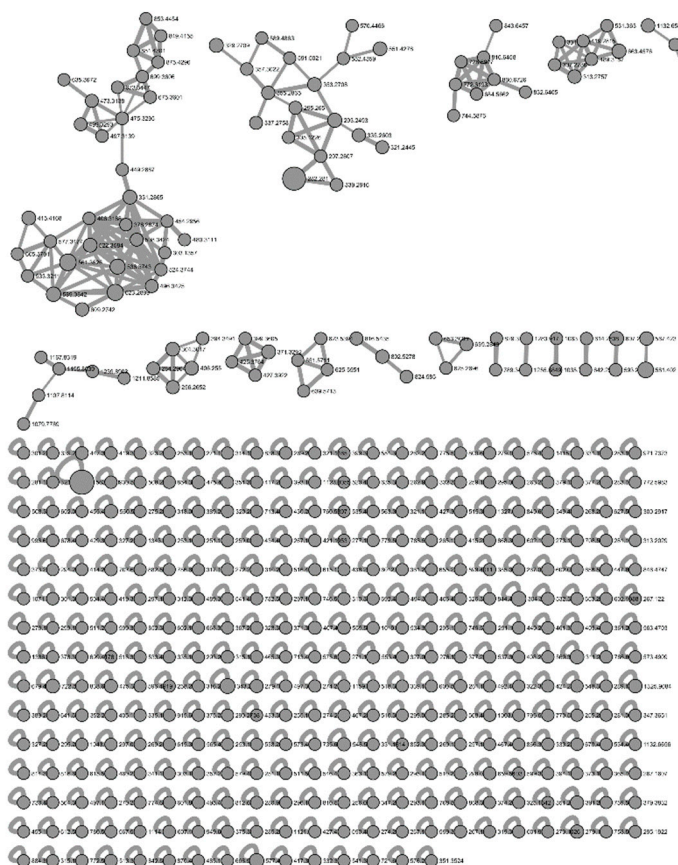

**Figure S13.** Molecular network of MeOH and BuOH extracts of *Anabaena flos-aquae* UTEX 1444
